# Supplementary material for: Advantages and challenges associated with bisulfite-assisted nanopore direct RNA sequencing for modifications
Source: Royal Society of Chemistry journal article supplement (doi:10.1039/d3cb00081h), 2023-01-01
Supplement: d3cb00081h1.pdf [file d3cb00081h1.pdf]

## Electronic Supplementary Information

### Advantages and challenges associated with bisulfite-assisted nanopore direct RNA sequencing for modifications

Aaron M. Fleming,\* Judy Zhu, Vilhelmina K. Done, and Cynthia J. Burrows\*

Department of Chemistry, University of Utah, 315 S. 1400 East, Salt Lake City, UT, 84112-0850,

United States

| <b>Item</b>                                                                                                                             | <b>Page</b> |
|-----------------------------------------------------------------------------------------------------------------------------------------|-------------|
| <b>Figure S1.</b> RNA sequences studied and their characterization.                                                                     | S2          |
| <b>Figure S2.</b> Alignment details for the sequencing data.                                                                            | S4          |
| <b>Figure S3.</b> The IGV plots for the sequencing experiments.                                                                         | S5          |
| <b>Figure S4.</b> The rRNA nanopore direct RNA sequencing base call analysis data.                                                      | S6          |
| <b>Figure S5.</b> Characterization of the bisulfite adduct to $\Psi$ -containing RNA.                                                   | S11         |
| <b>Figure S6.</b> The FastQC analysis of the reads.                                                                                     | S12         |
| <b>Figure S7.</b> The ESB radar plots for U, $\Psi$ , and the $\Psi$ -(SO <sub>3</sub> <sup>-</sup> ) adducts in the sequences studied. | S13         |
| <b>Figure S8.</b> The ELIGOS2 computed <i>P</i> -values for the titration of U with $\Psi$ or $\Psi$ -(SO <sub>3</sub> <sup>-</sup> ).  | S14         |
| <b>Figure S9.</b> Additional data and discussion regarding the bisulfite reaction on rRNA.                                              | S15         |
| <b>Figure S10.</b> Base call data at known U/C sequence variations in the <i>E. coli</i> rRNA strands.                                  | S16         |
| <b>Figure S11.</b> Studies on $\Psi$ -(SO <sub>3</sub> <sup>-</sup> ) adducts impacting the raw nanopore data.                          | S17         |
| <b>References</b>                                                                                                                       | S21         |

**Figure S1.** RNA sequences studied and their characterization.

The sequences provided are for the DNA coding strands of the duplex DNA used for the in vitro transcription of the RNA studied. The T7 RNA polymerase promoter in each sequence is underlined.

The first two sequences were used to explore the nanopore sequencer responses for U,  $\Psi$ , and the  $\Psi$ -( $\text{SO}_3^-$ ) adducts.

Strand 1

5' - AAGCTAATACGACTCACTATAGGAGCACAGGACCAGACGCTGCACAGAGCCGAAGCACAGCAGACCA  
GACCTTATCCAGAAGACGAGACCAATGACCAGAAGCCGAAGCACAGACGAAATTAGCCAGACGGACA  
ACAGCAGAGACCGAAGCGTGGGCAGACACGCAGCGACAGAGCAGCAGGTGAGGACCAGTCAGGACA  
ACAGAAAAACAAAAAAAAA

Strand 2

5' - AAGCTAATACGACTCACTATAGGAGCAGCACGAGACGAGGTGACACGACAGAGAGCGGACGCAGTCACGACCG  
ACGAACACGCAGCTGCCAGACAAAGAGAACGCAGCACGACGTAGCGACGCAGACGGCGCAGCGAGCATAGCAGC  
CACGCAGCCACGCACAGACCGTCCAGCCGACGAGCACGACACATCGCGACGGCACGGAGCGGACGCACGAC  
GAGCACAAAACAAAAAAAAA

The third strand studied the expansion of the two k-mers to sequences that include the space up to the helicase.

Strand 3

5' - AAGCTAATACGACTCACTATAGGAGCAGCACGAGACGAGGTGACACGCGAGACAGACACACGGCGGGTGCCG  
ACGAACAC AAAACGGCGGCCGTAACGCCAGACAAAGAGCAACGGCGGCCGTAACGACGCAGACGGCGCAGCG  
AGCACGCACG CACACGGCGGCCGTAACAGCCGACGAGCACGACGACGGCACGGAGCGGACGCACGACG  
AGCACAAAACAAAAAAAAA

The fourth strand was used to study the nanopore response in the current and dwell time data for two  $\Psi$  or  $\Psi$ -( $\text{SO}_3^-$ ) adducts.

Strand 4

5' - AAGCTAATACGACTCACTATAGGAGCAGCACGAGACGAGGCGACACGACAGAGAGCGACGAAAAACGATCAG  
CCCCACGACACGCAGCGCCAGACAAAGAGAACGCAGCACGACGAGCGACGCAGACGGCGCAGCGAGCAAGCAC  
GCACGCAGCCACGAAAAACCGTGCACCCCCAGCCGACGAGCACGACACACGCGACGGCACGGAGCGGACGCA  
CGACGAGCACAAAACAAAAAAAAA

The fifth strand was used to study the nanopore sequencer responses for C,  $\text{m}^5\text{C}$ , and  $\text{hm}^5\text{C}$  before and after the pH 5 bisulfite reaction.

Strand 5

5' - AAGCTAATACGACTCACTATAGGAGTATAGGATTAGATAGATGGCGGAGTTGAAGTATAGTAGATTAGAGTCAGA  
GAAGATGAGATTGAGGTCGGTTAGAAGTTGATGTATAGATGATGCAGTTAGATGGATAGTAATTTTAGTAGAGAT  
TGAAGGTCAAGTAGATATGTTAGTAGACCGGTGATGAGGTGATATTGTCGTGGATATTAGATATATGGGGAGATG  
ATAGTAGAGGATTGAAAATAAAAAAAAAA

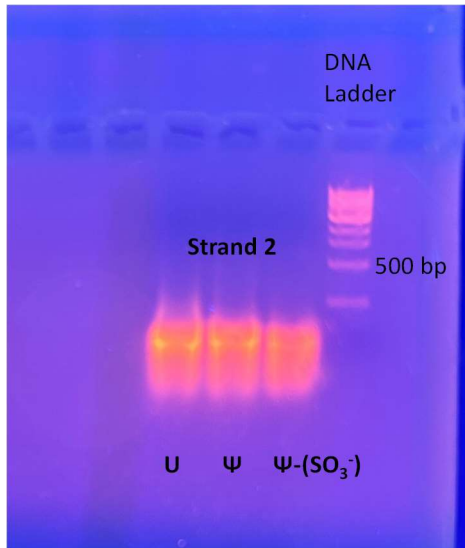

Example 1% agarose gel electrophoresis analyses conducted on strand 2 with U,  $\Psi$ , or  $\Psi$ -(SO<sub>3</sub><sup>-</sup>) adduct. The example gel provided verifies the band profile did not change after the bisulfite reaction for verification the RNA had not undergone significant degradation. The lanes were overloaded to visualize whether there was an increase in the short strands that are less intense from the ethidium bromide stain used for visualization. The commercial ladder used for comparison was a DNA ladder, not an ssRNA ladder. In our hands, by the time the RNA ladders were received in the lab, they had already degraded to a point that rendered them unusable for comparison. The high stability of DNA is far superior for these ladders; moreover, the gel was used to determine if the band profile was the same between the RNAs, which it was, and never used for estimation of the strand length. Information about length was provided by the nanopore sequencing experiment.

**Figure S2.** Alignment details for the sequencing data.

| Sample                                                 | Alignment Count | Reads Collected |
|--------------------------------------------------------|-----------------|-----------------|
| Strand 5 (C + HSO <sub>3</sub> <sup>-</sup> , pH 5)    | 1305            | 3819            |
| Strand 5 (m5C + HSO <sub>3</sub> <sup>-</sup> , pH 5)  | 3271            | 5977            |
| Strand 2 (Psi + HSO <sub>3</sub> <sup>-</sup> , pH 7)  | 1353            | 13084           |
| Strand 1 (Psi + HSO <sub>3</sub> <sup>-</sup> , pH 7)  | 17326           | 45848           |
| Strand 4 (U)                                           | 3420            | 6000            |
| Strand 4 (Psi)                                         | 2802            | 6919            |
| Strand 4 (Psi + HSO <sub>3</sub> <sup>-</sup> , pH 7)  | 2482            | 7242            |
| HCT116                                                 | 621             | 3914            |
| HCT116 (+HSO <sub>3</sub> <sup>-</sup> , pH 7)         | 4541            | 220656          |
| <i>E. coli</i> (+HSO <sub>3</sub> <sup>-</sup> , pH 5) | 1729            | 14078           |
| <i>E. coli</i> (+HSO <sub>3</sub> <sup>-</sup> , pH 7) | 34317           | 189930          |
| Strand 5 (hm5C)                                        | 3885            | 8913            |
| Strand 5 (HM5C, HSO <sub>3</sub> <sup>-</sup> , pH 5)  | 360             | 3175            |
| Strand 3 (Psi)                                         | 2416            | 6981            |

The alignment data for the synthetic RNA, *E. coli* and strands 1, 2, and 5 before the bisulfite reaction were previously reported by our lab.<sup>1-3</sup>

**Figure S3.** The IGV plots for the sequencing experiments.

Strand 4 (U top panel), Psi (middle panel) and Psi-(SO3-) (bottom panel)

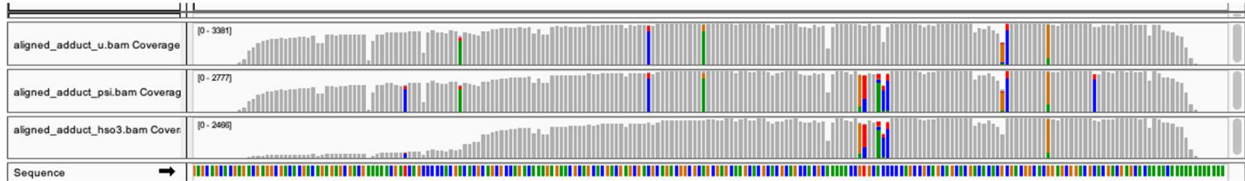

Strand 3 (Psi)

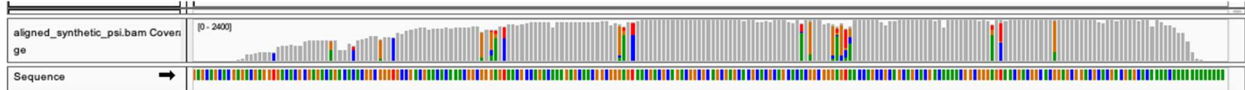

E.coli 5S rRNA pH 7 HSO3-

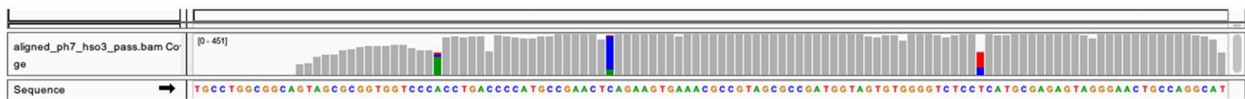

E.coli 16S rRNA pH 7 HSO3-

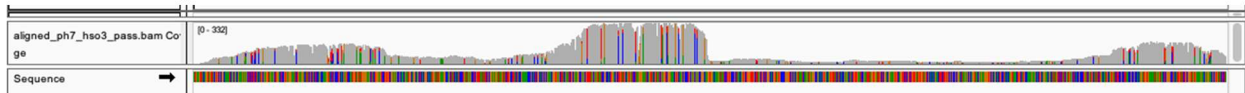

E.coli 23S rRNA pH 7 HSO3-

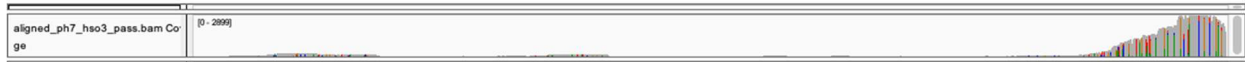

HCT116 5.8S rRNA pH 7 HSO3-

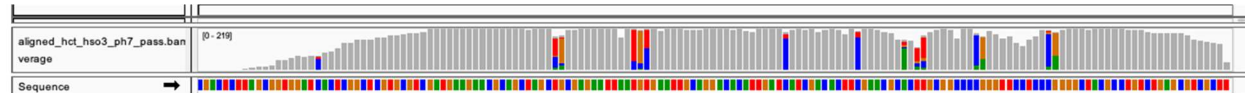

HCT116 18S rRNA pH 7 HSO3-

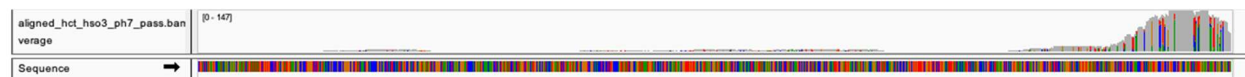

HCT116 28S rRNA pH 7 HSO3-

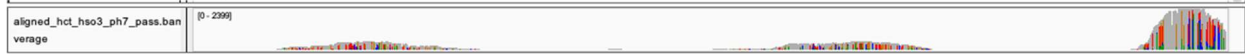

The IGV analysis of the aligned sequencing data provides a graphical analysis of the coverage across the reference sequence and gives an indication of the base call errors. These examples IGV plots were constructed with the default settings in IGV. The color code is gray = sequence reads give >70% consensus with the reference base; when the sequence alignment yields a mixture of nucleotides that are <70% consensus, the mixture of bases is color-coded in which green = A, blue = C, yellow = G, red = U, and white space above = indels (for this reason, we have remade the plots in the text and later in the ESI with the indels color-coded black). The reference sequence is color-coded below the bar charts using the same color key. These plots demonstrate the sequence reads have greater coverage at the 3' end that decreases toward the 5' ends. This is an expected result that is found in all nanopore RNA sequencing data because the strand is threaded 3' to 5'. The sites where there exists the greatest mixture of base calls occur at the  $\Psi$  sites.

**Figure S4.** The rRNA nanopore direct RNA sequencing base call analysis data.

| rRNA Strand | Position | Base Calls |     |    |    |    | Indel | Total    | Error frac | Error % | MS Amt | kmer |
|-------------|----------|------------|-----|----|----|----|-------|----------|------------|---------|--------|------|
|             |          | U          | C   | A  | G  |    |       |          |            |         |        |      |
| Human 5.8S  | 55       | 89         | 81  | 16 | 14 | 58 | 258   | 0.655039 | 65.50388   | 60      | GCXGC  |      |
|             | 69       | 77         | 155 | 3  |    | 12 | 247   | 0.688259 | 68.82591   | 61      | UGXGA  |      |
| Human 18S   | 34       | 5          |     |    |    |    | 5     | 0        | 0          | 100     | UGXCX  |      |
|             | 36       |            | 6   |    |    |    | 6     | 1        | 100        | 82      | XCXCA  |      |
|             | 93       | 2          | 4   |    |    |    | 6     | 0.666667 | 66.66667   | 87      | AAXGG  |      |
|             | 105      | 2          | 2   |    | 2  |    | 6     | 0.666667 | 66.66667   | 99      | AAXCA  |      |
|             | 109      | 2          | 4   |    |    |    | 6     | 0.666667 | 66.66667   | 99      | GUXAU  |      |
|             | 119      |            | 4   |    |    | 4  | 8     | 1        | 100        | 94      | CCXUU  |      |
|             | 210      | 6          |     |    |    | 2  | 8     | 0.25     | 25         | 83      | GAXGC  |      |
|             | 218      | 2          | 6   |    |    |    | 8     | 0.75     | 75         | 100     | CAXUU  |      |
|             | 296      | 6          |     |    | 2  | 2  | 10    | 0.4      | 40         | 25      | UCXAG  |      |
|             | 406      | 6          | 4   |    |    |    | 10    | 0.4      | 40         | 87      | GGXGA  |      |
|             | 572      | 5          |     |    |    | 1  | 6     | 0.166667 | 16.66667   | 97      | CUXUA  |      |
|             | 609      |            | 6   |    |    |    | 6     | 1        | 100        | 90      | UCXGG  |      |
|             | 649      | 2          |     |    |    | 4  | 6     | 0.666667 | 66.66667   | 93      | UAXUA  |      |
|             | 651      | 1          | 4   |    |    | 1  | 6     | 0.833333 | 83.33333   | 93      | UUXCX  |      |
|             | 681      | 2          |     | 1  | 2  | 1  | 6     | 0.666667 | 66.66667   | 62      | XCXGC  |      |
|             | 686      | 2          | 1   | 1  |    | 2  | 6     | 0.666667 | 66.66667   | 95      | GAXCU  |      |
|             | 801      | 1          | 6   |    |    |    | 7     | 0.857143 | 85.71429   | 100     | UUXAC  |      |
|             | 814      | 4          | 3   |    |    |    | 7     | 0.428571 | 42.85714   | 100     | AAXXAG |      |
|             | 815      |            | 7   |    |    |    | 7     | 1        | 100        | 100     | AAXXAG |      |
|             | 822      | 3          |     |    |    | 7  | 10    | 0.7      | 70         | 99      | UGXUC  |      |
|             | 863      | 4          | 2   | 1  |    | 1  | 8     | 0.5      | 50         | 95      | AAXAA  |      |
|             | 866      | 3          | 3   | 2  |    | 1  | 9     | 0.666667 | 66.66667   | 88      | AAXGG  |      |
|             | 897      | 5          | 1   | 1  |    | 3  | 10    | 0.5      | 50         | 23      | GUXUU  |      |
|             | 918      | 7          | 1   |    |    | 1  | 9     | 0.222222 | 22.22222   | 42      | AUXAA  |      |
|             | 966      | 1          | 11  |    |    |    | 12    | 0.916667 | 91.66667   | 89      | AUXCU  |      |
|             | 1004     | 4          | 9   |    |    |    | 13    | 0.692308 | 69.23077   | 97      | UUXGC  |      |
|             | 1045     | 2          | 6   | 1  |    | 7  | 16    | 0.875    | 87.5       | 92      | GGXXCG |      |
|             | 1046     | 1          | 7   | 1  | 1  | 3  | 13    | 0.923077 | 92.30769   | 100     | GGXXCG |      |
|             | 1056     | 2          | 9   |    |    | 2  | 13    | 0.846154 | 84.61538   | 93      | GAXCA  |      |
|             | 1081     | 4          |     |    |    | 10 | 14    | 0.714286 | 71.42857   | 94      | CAXAA  |      |
|             | 1136     | 9          | 1   | 1  |    | 5  | 16    | 0.4375   | 43.75      | 7       | AXCUC  |      |
|             | 1174     | 7          | 7   | 1  |    | 5  | 20    | 0.65     | 65         | 100     | UAXGG  |      |
|             | 1177     | 7          | 7   | 4  |    | 2  | 20    | 0.65     | 65         | 100     | GUXGC  |      |
|             | 1232     | 6          | 11  | 1  |    | 1  | 19    | 0.684211 | 68.42105   | 98      | CCXGC  |      |
|             | 1238     | 8          | 6   | 2  | 1  | 1  | 18    | 0.555556 | 55.55556   | 97      | GCXUA  |      |
|             | 1244     | 11         | 6   |    |    | 2  | 19    | 0.421053 | 42.10526   | 100     | UUXGA  |      |
|             | 1347     | 11         | 11  |    | 1  | 2  | 25    | 0.56     | 56         | 98      | GUXGG  |      |
|             | 1367     | 12         | 5   | 2  | 2  | 3  | 24    | 0.5      | 50         | 98      | GUXAA  |      |
|             | 1445     | 8          | 7   | 1  |    | 6  | 22    | 0.636364 | 63.63636   | 90      | CUXAG  |      |
|             | 1625     | 10         | 4   | 2  |    | 9  | 25    | 0.6      | 60         | 79      | AUXCC  |      |
|             | 1643     | 15         | 6   | 1  |    | 4  | 26    | 0.423077 | 42.30769   | 96      | AUXCC  |      |
|             | 1692     | 19         | 6   |    |    | 1  | 26    | 0.269231 | 26.92308   | 98      | UUXGU  |      |

| rRNA Strand | Position | Base Calls |    |   |   |   | Indel | Total | Error frac | Error %  | MS Amt | kmer    |
|-------------|----------|------------|----|---|---|---|-------|-------|------------|----------|--------|---------|
|             |          | U          | C  | A | G |   |       |       |            |          |        |         |
| Human 28S   | 1523     | 1          | 3  |   |   |   | 2     | 6     | 0.833333   | 83.33333 | 88     | ACUAAU  |
|             | 1569     | 5          |    |   |   |   | 1     | 6     | 0.166667   | 16.66667 | 68     | UCXGG   |
|             | 1664     | 2          | 1  |   |   |   | 3     | 6     | 0.666667   | 66.66667 | 97     | CCXCC   |
|             | 1670     | 2          | 2  |   |   |   | 1     | 5     | 0.6        | 60       | 96     | GAXAG   |
|             | 1731     | 2          | 2  |   |   |   | 1     | 5     | 0.6        | 60       | 100    | AAXGA   |
|             | 1766     |            | 4  | 1 |   |   |       | 5     | 1          | 100      | 40     | CCXAU   |
|             | 1768     | 3          |    | 1 |   |   | 1     | 5     | 0.4        | 40       | 100    | UAXXCU  |
|             | 1769     | 1          | 4  |   |   |   | 1     | 6     | 0.833333   | 83.33333 | 100    | AUXCU   |
|             | 1779     | 2          | 1  | 1 |   |   | 1     | 5     | 0.6        | 60       | 100    | UUXAA   |
|             | 1847     | 3          | 2  |   |   |   | 1     | 6     | 0.5        | 50       | 95     | ACXUXUG |
|             | 1849     | 4          | 1  | 1 |   |   | 2     | 8     | 0.5        | 50       | 95     | ACXUXUG |
|             | 2495     | 5          | 4  |   |   |   | 2     | 11    | 0.545455   | 54.54545 | 92     | GAXCG   |
|             | 2619     | 5          | 2  |   |   |   | 4     | 11    | 0.545455   | 54.54545 | 90     | UUXUC   |
|             | 2826     |            | 11 |   |   | 1 | 6     | 18    | 1          | 100      | 20     | UGXAG   |
|             | 2830     | 10         | 2  |   |   |   |       | 12    | 0.166667   | 16.66667 | 9      | GGXAA   |
|             | 3616     | 8          | 6  |   |   | 1 | 6     | 21    | 0.619048   | 61.90476 | 89     | ACXGXUU |
|             | 3618     | 10         | 7  | 1 |   |   | 2     | 20    | 0.5        | 50       | 95     | ACXGXUU |
|             | 3674     | 11         | 9  |   |   |   | 1     | 21    | 0.47619    | 47.61905 | 99     | UUXCU   |
|             | 3709     | 7          | 77 | 1 |   |   | 1     | 86    | 0.918605   | 91.86047 | 72     | AUXCA   |
|             | 3713     | 15         | 4  |   |   |   | 3     | 22    | 0.318182   | 31.81818 | 98     | AAXGA   |
|             | 3737     | 10         | 8  | 1 |   |   | 1     | 20    | 0.5        | 50       | 85     | AGXAA   |
|             | 3741     | 6          | 5  |   |   | 2 | 7     | 20    | 0.7        | 70       | 100    | ACXAX   |
|             | 3743     | 5          | 11 |   |   |   | 3     | 19    | 0.736842   | 73.68421 | 100    | XAXGA   |
|             | 3747     | 9          | 4  | 4 |   |   | 4     | 21    | 0.571429   | 57.14286 | 100    | ACXCX   |
|             | 3749     | 13         |    |   |   |   | 6     | 19    | 0.315789   | 31.57895 | 100    | XCXCU   |
|             | 3801     | 15         | 2  |   |   | 1 | 4     | 22    | 0.318182   | 31.81818 | 50     | GAXGA   |
|             | 3823     | 4          | 10 |   |   |   | 7     | 21    | 0.809524   | 80.95238 | 66     | CCXAC   |
|             | 3830     | 9          | 4  | 1 |   |   | 7     | 21    | 0.571429   | 57.14286 | 92     | ACXAX   |
|             | 3832     | 12         | 7  | 1 |   |   | 6     | 26    | 0.538462   | 53.84615 | 100    | XAXCC   |
|             | 3863     | 12         | 4  | 1 |   |   | 6     | 23    | 0.478261   | 47.82609 | 33     | CUXGG   |
|             | 3899     |            | 19 |   |   |   | 3     | 22    | 1          | 100      | 100    | GCXUG   |
|             | 3938     |            | 16 | 3 |   |   | 4     | 23    | 1          | 100      | 93     | UGXAG   |
|             | 4263     | 7          | 12 | 3 |   |   | 12    | 34    | 0.794118   | 79.41176 | 98     | GAXCU   |
|             | 4266     | 22         | 8  |   |   |   | 1     | 31    | 0.290323   | 29.03226 | 90     | CUXGA   |
|             | 4269     | 4          | 7  | 1 |   |   | 20    | 32    | 0.875      | 87.5     | 93     | AUXUU   |
|             | 4282     | 10         | 13 | 1 |   |   | 9     | 33    | 0.69697    | 69.69697 | 83     | AAXAC   |
|             | 4323     | 13         | 10 | 3 |   |   | 5     | 31    | 0.580645   | 58.06452 | 95     | UUXUG   |
|             | 4331     | 5          | 22 | 1 |   |   | 4     | 32    | 0.84375    | 84.375   | 93     | UUXAA   |
|             | 4373     | 9          | 22 |   |   |   | 6     | 37    | 0.756757   | 75.67568 | 96     | GCXUG   |
|             | 4390     | 9          | 17 |   |   |   | 10    | 36    | 0.75       | 75       | 99     | GUXCA   |
|             | 4393     | 13         | 13 |   |   | 1 | 12    | 39    | 0.666667   | 66.66667 | 97     | CAXAG   |
|             | 4401     | 5          | 21 |   |   |   | 6     | 32    | 0.84375    | 84.375   | 89     | CGXCG   |
|             | 4412     | 11         | 8  | 3 |   |   | 14    | 36    | 0.694444   | 69.44444 | 100    | GAXCC   |
|             | 4427     | 4          | 16 | 3 |   |   | 8     | 31    | 0.870968   | 87.09677 | 98     | GXCXU   |
|             | 4441     | 21         | 8  |   |   | 1 | 1     | 31    | 0.322581   | 32.25806 | 87     | UGXGA   |
|             | 4463     | 17         | 2  | 1 |   | 2 | 10    | 32    | 0.46875    | 46.875   | 17     | GUXGG   |
|             | 4470     | 16         | 5  |   |   | 4 | 8     | 33    | 0.515152   | 51.51515 | 100    | UGXUC   |
|             | 4491     | 21         | 7  | 2 |   | 1 | 5     | 36    | 0.416667   | 41.66667 | 91     | CGXGA   |
|             | 4502     | 5          | 22 |   |   | 2 | 3     | 32    | 0.84375    | 84.375   | 100    | UUXAG   |
|             | 4522     | 6          | 30 | 1 |   |   | 7     | 44    | 0.863636   | 86.36364 | 98     | GUXAG   |
|             | 4546     | 13         | 15 | 2 |   | 1 | 10    | 41    | 0.682927   | 68.29268 | 100    | UGXUG   |
|             | 4549     | 6          | 24 | 4 |   | 2 | 7     | 43    | 0.860465   | 86.04651 | 100    | GUXGC   |
|             | 4598     | 27         | 12 | 1 |   |   | 9     | 49    | 0.44898    | 44.89796 | 92     | UUXGG   |
|             | 4606     | 29         | 11 | 1 |   | 1 | 4     | 46    | 0.369565   | 36.95652 | 42     | UAXGU   |
|             | 4643     | 22         | 9  | 2 |   |   | 13    | 46    | 0.521739   | 52.17391 | 39     | CAXCU   |
|             | 4659     | 13         | 23 | 3 |   | 1 | 7     | 47    | 0.723404   | 72.34043 | 87     | ACXGA   |
|             | 4937     | 12         | 5  | 4 |   |   | 13    | 34    | 0.647059   | 64.70588 | 81     | AGXCA   |
|             | 4966     | 10         | 6  | 2 |   |   | 2     | 20    | 0.5        | 50       | 86     | GGXUU   |
|             | 4975     | 7          | 9  | 1 |   |   | 5     | 22    | 0.681818   | 68.18182 | 75     | CGXAG   |

| rRNA Strand | Position | Base Calls |      |      |      |      | Indel | Total    | Error frac | Error % | MS Amt | kmer |
|-------------|----------|------------|------|------|------|------|-------|----------|------------|---------|--------|------|
|             |          | U          | C    | A    | G    |      |       |          |            |         |        |      |
| E. coli 16S | 516      | 453        | 854  | 6    |      | 273  | 1586  | 0.714376 | 71.43758   | 90      | CGXGC  |      |
| E. coli 23S | 746      | 35         |      | 77   |      | 60   | 172   | 0.796512 | 79.65116   | 90      | UGXUG  |      |
|             | 955      | 66         | 778  | 7    | 7    | 104  | 962   | 0.931393 | 93.13929   | 95      | GGXGC  |      |
|             | 1911     | 1419       | 2578 | 7    | 4    | 667  | 4675  | 0.696471 | 69.64706   | 90      | CGXAA  |      |
|             | 1917     | 151        | 623  |      |      | 195  | 969   | 0.844169 | 84.41692   | 90      | XAXAA  |      |
|             | 2457     | 1711       | 2005 | 1619 | 1055 | 3944 | 10334 | 0.83443  | 83.443     | 90      | GCXGA  |      |
|             | 2504     | 118        | 115  | 0    | 3    | 33   | 269   | 0.561338 | 56.13383   | 90      | GAXGU  |      |
|             | 2580     | 821        | 6221 | 1999 | 337  | 1988 | 11366 | 0.927767 | 92.7767    | 90      | G CXGG |      |
|             | 2604     | 209        | 68   | 7    | 1    | 31   | 316   | 0.338608 | 33.86076   | 90      | AGXUC  |      |
|             | 2605     | 28         | 259  | 13   | 1    | 18   | 319   | 0.912226 | 91.22257   | 90      | GUXCG  |      |

The HCT116 RNA was sequenced in the smaller Flongle flow cell, which is why the read count is low. The base calling error analysis used data with a read depth of >5.

The mass spectrometry (MS) values were obtained from the literature.<sup>4,5</sup> The base call values for *E. coli* rRNA were previously reported by our lab.<sup>2</sup>



The base call data for the 28 rRNA  $\Psi$  sites in 5-nt k-mer contexts that fit the sequence 5'-VV $\Psi$ VV-3' (V  $\neq$  U).

| organism | location | kmer  | Bases Called |      |      |      |       |                | Total    | Error Fract | Fract. Mod. | Corrected |
|----------|----------|-------|--------------|------|------|------|-------|----------------|----------|-------------|-------------|-----------|
|          |          |       | U            | C    | A    | G    | indel | Error Fraction |          |             |             |           |
| E. coli  | 16S 516  | CGXGC | 453          | 854  | 6    |      | 273   | 1586           | 0.714376 | 1           | 0.714376    |           |
|          | 23S 955  | GGXGC | 66           | 778  | 7    | 7    | 104   | 962            | 0.931393 | 1           | 0.931393    |           |
|          | 23S 1911 | CGXAA | 1419         | 2578 | 7    | 4    | 667   | 4675           | 0.696471 | 1           | 0.696471    |           |
|          | 23S 2457 | GCXGA | 1711         | 2005 | 1619 | 1055 | 3944  | 10334          | 0.83443  | 1           | 0.83443     |           |
|          | 23S 2580 | GCXGG | 821          | 6221 | 1999 | 337  | 1988  | 11366          | 0.927767 | 1           | 0.927767    |           |
| human    | 5.8S 55  | GXGC  | 89           | 81   | 16   | 14   | 58    | 258            | 0.655039 | 1           | 0.655039    |           |
|          | 18S 93   | AAXGG | 2            | 4    |      |      |       | 6              | 0.666667 | 0.87        | 0.58        |           |
|          | 18S 105  | AAXCA | 2            | 2    |      | 2    |       | 6              | 0.666667 | 1           | 0.666667    |           |
|          | 18S 210  | GAXGC | 6            |      |      |      | 2     | 8              | 0.25     | 0.83        | 0.2075      |           |
|          | 18S 406  | GGXGA | 6            | 4    |      |      |       | 10             | 0.4      | 0.87        | 0.348       |           |
|          | 18S 863  | AAXAA | 4            | 2    | 1    |      | 1     | 8              | 0.5      | 0.95        | 0.475       |           |
|          | 18S 1056 | GAXCA | 2            | 9    |      |      |       | 13             | 0.846154 | 0.93        | 0.786923    |           |
|          | 18S 1081 | CAXAA | 4            |      |      |      | 10    | 14             | 0.714286 | 0.94        | 0.671429    |           |
|          | 28S 1664 | CCXCC | 2            | 1    |      |      | 3     | 6              | 0.666667 | 1           | 0.666667    |           |
|          | 28S 1683 | GAXAG | 2            | 2    |      |      | 1     | 5              | 0.6      | 0.96        | 0.576       |           |
|          | 28S 1744 | AAXGA | 2            | 2    |      |      | 1     | 5              | 0.6      | 1           | 0.6         |           |
|          | 28S 2508 | GAXCG | 5            | 4    |      |      | 2     | 11             | 0.545455 | 0.92        | 0.501818    |           |
|          | 28S 2843 | GGXAA | 10           | 2    |      |      |       | 12             | 0.166667 | 0.1         | 0.016667    |           |
|          | 28S 3734 | AAXGA | 15           | 4    |      |      | 3     | 22             | 0.318182 | 0.98        | 0.311818    |           |
|          | 28S 3822 | GAXGA | 15           | 2    |      |      | 1     | 22             | 0.318182 | 0.5         | 0.159091    |           |
|          | 28S 3844 | CCXAC | 4            | 10   |      |      |       | 7              | 0.809524 | 0.66        | 0.534286    |           |
|          | 28S 4312 | AAXAC | 10           | 13   | 1    |      |       | 9              | 0.69697  | 0.83        | 0.578485    |           |
|          | 28S 4423 | CAXAG | 13           | 13   |      |      | 1     | 12             | 0.666667 | 0.97        | 0.646667    |           |
|          | 28S 4431 | CGXCG | 5            | 21   |      |      |       | 6              | 0.84375  | 0.89        | 0.750938    |           |
|          | 28S 4442 | GAXCC | 11           | 8    | 3    |      |       | 14             | 0.694444 | 1           | 0.694444    |           |
| 28S 4689 | ACXGA    | 13    | 23           | 3    | 1    |      | 7     | 0.723404       | 0.87     | 0.629362    |             |           |
| 28S 4972 | AGXCA    | 12    | 5            | 4    |      |      | 13    | 0.647059       | 0.81     | 0.524118    |             |           |
| 28S 5010 | CGXAG    | 7     | 9            | 1    |      |      | 5     | 0.681818       | 0.75     | 0.511364    |             |           |

The base call data for the sequence matched synthetic 5-nt k-mer contexts that fit the sequence 5'-VVΨVV-3' (V ≠ U). The base call errors for synthetic RNA were previously reported by our lab.<sup>3</sup>

| Synthetic RNA | kmer  | U    | C    | A   | G    | indel | Full Total | Error Fract. |
|---------------|-------|------|------|-----|------|-------|------------|--------------|
|               | CGXGC | 7    | 15   |     |      | 4     | 26         | 0.730769     |
|               | GGXGC | 3    | 21   | 2   |      | 7     | 33         | 0.909091     |
|               | CGXAA | 45   | 21   | 2   |      | 125   | 193        | 0.766839     |
|               | GCXGA | 5    | 15   | 1   |      | 4     | 25         | 0.8          |
|               | GCXGG | 3    | 30   | 9   |      | 1     | 43         | 0.930233     |
|               | GCXGC | 1874 | 3428 | 87  | 7    | 548   | 5944       | 0.684724     |
|               | AAXGG | 31   | 11   | 2   |      | 22    | 66         | 0.530303     |
|               | AAXCA | 7    | 19   | 1   | 4    | 6     | 37         | 0.810811     |
|               | GAXGC | 16   | 4    |     |      | 4     | 24         | 0.333333     |
|               | GGXGA | 671  | 2777 |     |      | 5     | 3628       | 0.81505      |
|               | AAXAA | 4    | 10   |     |      | 1     | 15         | 0.733333     |
|               | GAXCA | 20   | 2    |     |      | 1     | 37         | 0.666667     |
|               | CAXAA | 40   | 7    | 1   | 1    | 129   | 178        | 0.775281     |
|               | CCXCC | 5    | 27   | 2   |      | 31    | 65         | 0.923077     |
|               | GAXAG | 2    | 7    |     |      | 1     | 2          | 0.833333     |
|               | AAXGA | 2    | 18   |     |      | 7     | 27         | 0.925926     |
|               | GAXCG | 18   | 27   |     |      | 3     | 48         | 0.625        |
|               | GGXAA | 16   | 61   | 2   | 1    | 12    | 92         | 0.826087     |
|               | AAXGA | 12   | 18   |     |      | 7     | 37         | 0.675676     |
|               | GAXGA | 31   | 6    |     |      | 4     | 41         | 0.243902     |
|               | CCXAC | 18   | 21   | 1   | 1    | 33    | 74         | 0.756757     |
|               | AAXAC | 9    | 8    | 6   |      | 23    | 46         | 0.804348     |
|               | CAXAG | 798  | 4400 | 82  | 14   | 970   | 6264       | 0.872605     |
|               | CGXCG | 468  | 4734 | 141 | 12   | 666   | 6021       | 0.922272     |
|               | GAXCC | 71   | 138  | 16  |      | 61    | 286        | 0.751748     |
|               | ACXGA | 8    | 20   |     |      | 8     | 36         | 0.777778     |
|               | AGXCA | 976  | 1723 | 242 | 1277 | 1864  | 6082       | 0.839526     |
|               | CGXAG | 1182 | 4142 | 91  | 22   | 746   | 6183       | 0.808831     |

**Figure S5.** Characterization of the bisulfite adduct to  $\Psi$ -containing RNA.

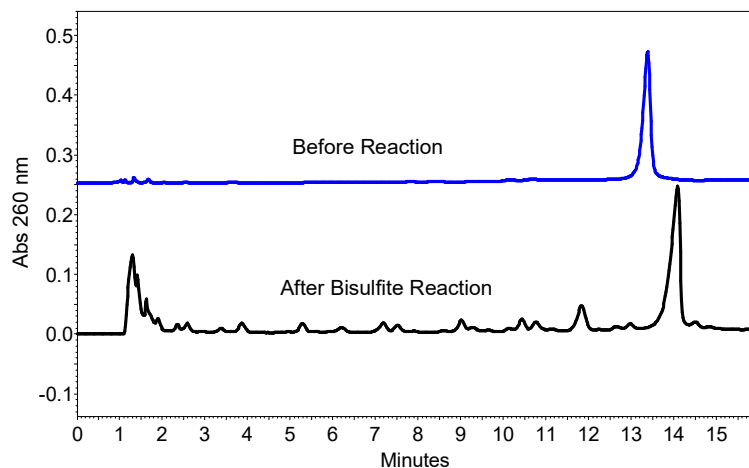

The sequence 5'-UAUU $\Psi$ UAAGGUGGAAGUUAGAGGt-3' was synthesized by established solid-phase synthesis methods using a thymidine-charged column (t) to enhance the synthetic yields; hence, the t nucleotide on the 3' end. The RNA strand was studied for verification of the bisulfite adduct forming in an RNA strand. The RNA was exposed to NaHSO<sub>3</sub> (3 M) at pH 7 and 65 °C for 4 h. The reacting salts were removed using a Nap-25 column (GE Health Sciences) using the manufacturer's protocol. The collected sample was then incubated at pH 8.5 in Tris buffer at 37 °C for 1h. The RNA strand was analyzed by anion-exchange HPLC before (blue trace) and after (black trace). The HPLC method was running a DNAPac PA-100 column with lines A = 1:9 MeCN:ddH<sub>2</sub>O and B = 1.5 M NaOAc (pH 7) in 1:9 MeCN:ddH<sub>2</sub>O. The method was initiated at 15% B followed by a linear gradient to 100% B with a flow rate of 1 mL/min while monitoring the elution via the absorbance at 260 nm.

**Figure S6.** The FastQC analysis of the reads.

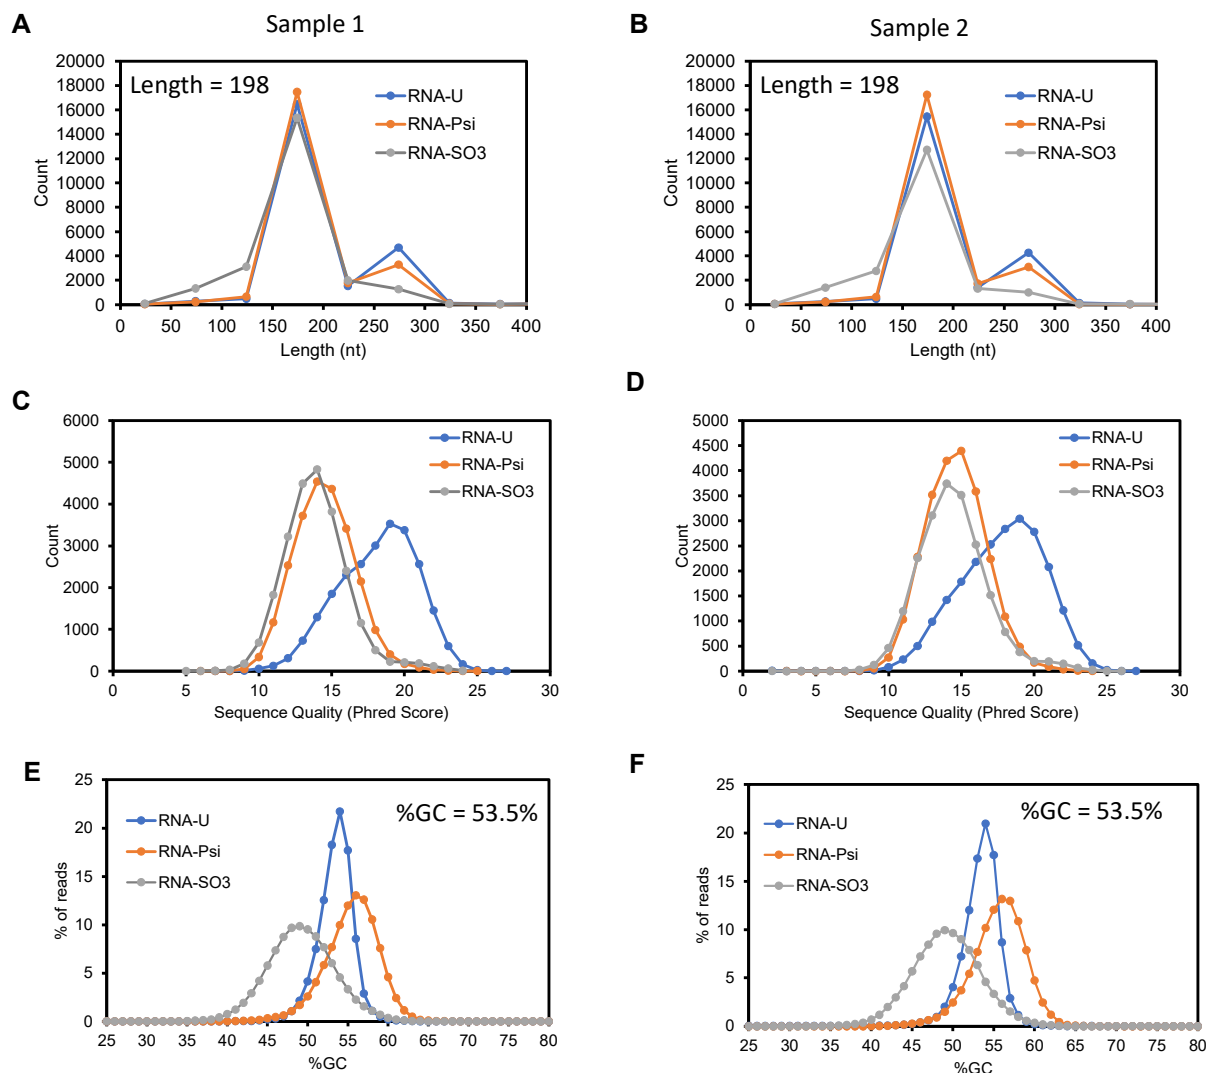

Example Fastqc analysis for strand 1 replicates (Sample 1 and Sample 2) with either a U,  $\Psi$  (Psi), or  $\Psi$ -( $\text{SO}_3^-$ ) adduct ( $\text{SO}_3$ ). The FASTQC analysis allows inspection of the sequencing reads before and after the reaction to look for changes. In plots A and B, read length histograms are provided. The distributions for U (blue),  $\Psi$  (orange), and  $\Psi$ -( $\text{SO}_3^-$ ) adduct (gray) are the same. This leads to the conclusion that  $\Psi$  and the  $\Psi$ -( $\text{SO}_3^-$ ) adduct go through the pore. In plots C and D are the histograms for the sequencing quality. These plots demonstrate the sequencing quality is best for the U-containing RNA and decreases for the  $\Psi$  and  $\Psi$ -( $\text{SO}_3^-$ ) adduct RNAs. Plots E and F provide the percentage of reads vs. the percent GC content. These find the U-containing RNA give a distribution centered around the predicted value provided in the upper right-hand corner of the plots. The  $\Psi$ -containing RNA give a slightly higher %GC content because  $\Psi$  is miscalled as a C; thus, increasing the average. The  $\Psi$ -( $\text{SO}_3^-$ ) adduct gave a slightly lower %GC that likely results from the increased indel frequency at these sites and adjacent sites.

**Figure S7.** The ESB radar plots for U,  $\Psi$ , and the  $\Psi$ -(SO<sub>3</sub><sup>-</sup>) adducts in the sequences studied.

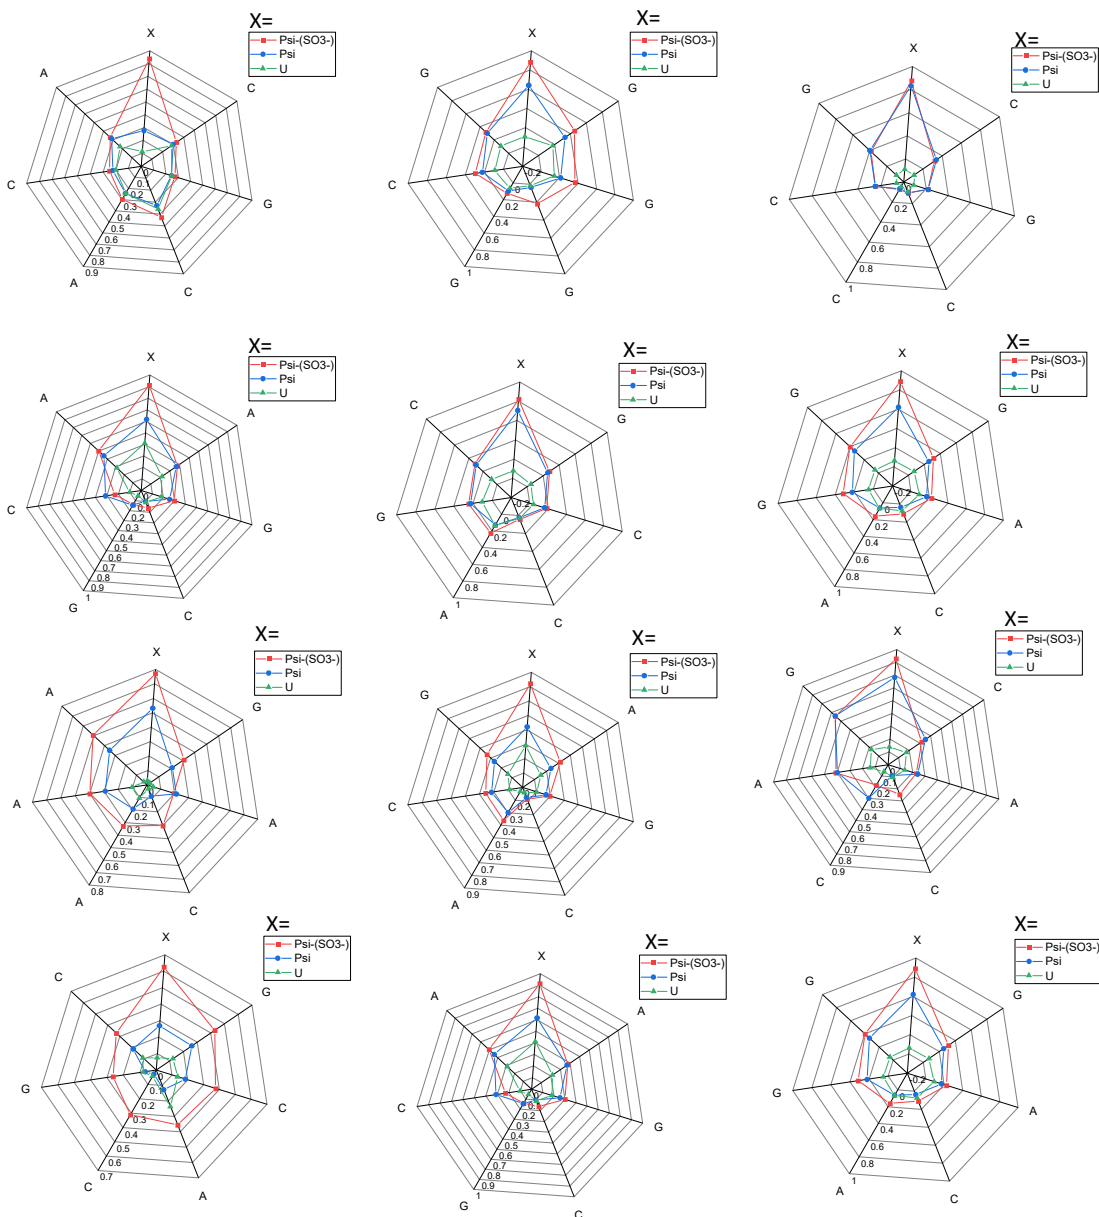

The radar plots illustrate that the ESB values for  $\Psi$  (blue line) are greater than the parent base U (green line) in 12 different sequence contexts; however, the ESB values for  $\Psi$  are  $> 0.3$ , which in some contexts is near the error of U. Further, they show the ESB values for the  $\Psi$ -(SO<sub>3</sub><sup>-</sup>) adduct (red) line are the greatest and always  $> 0.8$ . This observation suggests the adduct will always have greater base calling error when they pass through the nanopore and are interpreted by the base caller.

**Figure S8.** The ELIGOS2 computed *P*-values for the titration of U with  $\Psi$  or  $\Psi$ -(SO<sub>3</sub><sup>-</sup>).

| k-mer | 100% Psi | 100% psi-(so3-) | 50% Psi | 50% Psi-(SO3-) | 33% Psi | 33% Psi-(SO3-) | 20% Psi | 20% Psi-(SO3-) | 10% Psi | 10% Psi-(SO3-) |
|-------|----------|-----------------|---------|----------------|---------|----------------|---------|----------------|---------|----------------|
| GCXGC | 256.2    | 279.7           | 61.1    | 192.4          | 23.4    | 146.6          | 5.9     | 132.7          | 6.3     | 11.4           |
| CCXXA | 257.5    | 248.4           | 83.7    | 129.6          | 33.5    | 146.6          | 9.0     | 32.7           | 5.4     | 10.3           |
| CXXAX | 201.4    | 270.0           | 172.6   | 267.3          | 66.9    | 299.2          | 18.0    | 70.7           | 9.7     | 19.9           |
| XAXCC | 222.3    | 244.4           | 71.3    | 111.7          | 26.0    | 143.5          | 7.7     | 34.8           | 0.0     | 9.9            |
| AAXGA | 203.2    | 251.0           | 132.3   | 99.5           | 57.7    | 159.6          | 16.2    | 48.7           | 8.5     | 9.5            |
| AAAXA | 240.2    | 236.7           | 302.8   | 267.3          | 118.9   | 146.6          | 34.0    | 231.5          | 17.9    | 20.2           |
| AXXAG | 244.1    | 275.6           | 294.9   | 296.7          | 135.1   | 277.6          | 43.1    | 77.7           | 28.1    | 28.5           |
| CGXCC | 206.1    | 207.2           | 87.2    | 187.0          | 31.6    | 134.7          | 6.9     | 241.4          | 7.0     | 12.8           |
| GGXGA | 279.1    | 271.2           | 60.8    | 128.7          | 20.3    | 144.6          | 6.7     | 148.7          | 0.0     | 9.3            |
| AGXCA | 233.6    | 258.1           | 132.1   | 179.7          | 55.7    | 179.7          | 18.5    | 127.3          | 10.6    | 18.8           |
| GGXGA | 207.2    | 255.2           | 65.0    | 279.7          | 32.6    | 180.4          | 15.0    | 49.4           | 11.4    | 18.1           |
| AGXCA | 102.6    | 257.5           | 124.0   | 183.4          | 100.0   | 179.5          | 23.5    | 65.3           | 23.7    | 25.1           |
| GCXGC | 107.5    | 201.4           | 119.0   | 244.4          | 93.4    | 190.0          | 37.2    | 102.4          | 15.0    | 44.0           |
| CXXAG | 49.1     | 219.3           | 199.1   | 200.0          | 50.2    | 99.2           | 17.7    | 44.2           | 6.1     | 18.0           |
| CAXAG | 235.6    | 203.2           | 206.2   | 159.7          | 73.7    | 73.7           | 15.2    | 71.7           | 18.4    | 28.3           |
| CGXCG | 279.1    | 240.2           | 197.7   | 199.7          | 60.0    | 140.0          | 17.7    | 256.2          | 18.7    | 27.6           |
| CAXCG | 253.1    | 231.1           | 123.4   | 176.2          | 29.4    | 74.4           | 22.5    | 49.3           | 24.6    | 16.6           |

**Figure S9.** Additional data and discussion regarding the bisulfite reaction on rRNA.

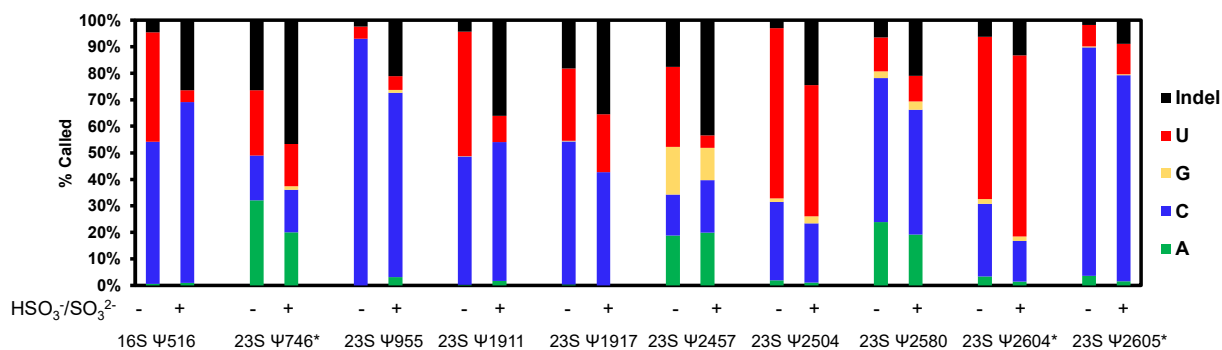

The bar chart above provides the base calling profile for the 10 *E. coli* rRNA Ψ sites before and after the pH 7 bisulfite reaction. These data provide additional examples of the indel frequency increasing as a result of the bisulfite adduct. \*Positions 23S Ψ746, 23S Ψ2604, and 23S Ψ2605 are Ψ sites in the rRNA where other modifications reside, which can impact the signals. For 23S Ψ746 there is a m<sup>1</sup>G at 745 and m<sup>5</sup>U at 747, and Ψ2604/ Ψ2605 are adjacent to one another.

The section below outlines an attempt to use the pH 7 bisulfite reaction to sequence for Ψ in human rRNA. As described below this did not work in our hands during two attempts. Additional optimizations in the future could get this experiment to work. We did not pursue this further in the present studies.

Example IGV plot for HCT116 28S after the pH 7 bisulfite reaction.

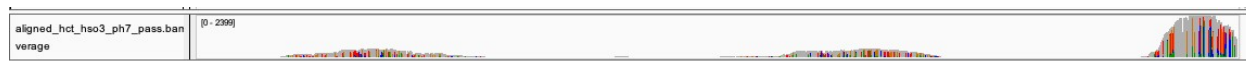

The poor alignment after the bisulfite reaction can come from many sources (see IGV image above). The first is it is well established that the bisulfite reaction causes low-yielding degradation of DNA,<sup>6</sup> and the less stable RNA polymer, likely degrades with higher yields. The degradation has been characterized as strand breaks and abasic site formation; whether this occurs in RNA is not known, and we did not evaluate this chemistry. While conducting the studies to understand the structures of the bisulfite ring-opened sugar adducts to Ψ,<sup>7</sup> we conducted test reactions on C, m<sup>5</sup>C, hm<sup>5</sup>C, and U to determine whether these other pyrimidines could form sugar adducts. On the basis of HPLC analysis identical to what was conducted with Ψ, when these pyrimidines were treated with bisulfite, low levels (<1%) of sugar adducts were formed; the yield for each of these nucleosides was so low that characterizing these adducts was not successful and this is why we have not reported on this chemistry. In long RNA, low-level reactions can become problematic for sequencing that may be leading to the challenges observed.

The key difference in the present work compared to other publications using the bisulfite reaction for analysis of Ψ or m<sup>5</sup>C in RNA is that we directly sequenced the RNA; in contrast, all other reports convert the RNA to a cDNA via reverse transcription followed by exponential PCR amplification.<sup>8-10</sup> In the present approach, all side reactions on the RNA from the bisulfite treatment will impact the sequencing. In any approach that utilizes reverse transcription and PCR, the polymerases will sanitize the reactions of the side reaction products because they will either not PCR amplify and are lost, or will be bypassed and either remain silent or yield a signature that is omitted from the downstream analysis because it is present in such low levels.

**Figure S10.** Base call data at known U/C sequence variations in the *E. coli* rRNA strands.

16S rRNA U/C Sequence Variations

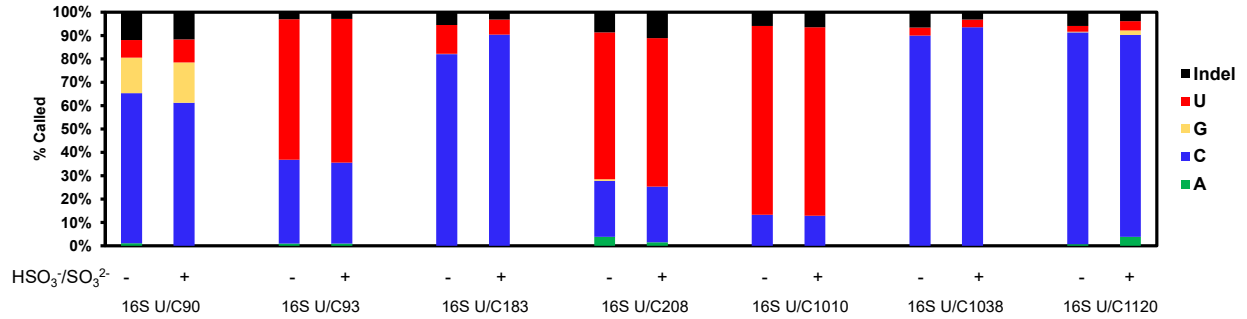

23S rRNA U/C Sequence Variations

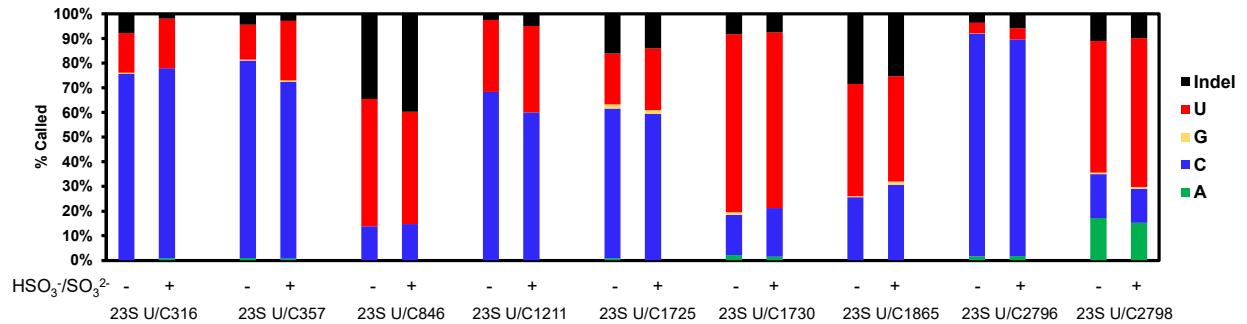

The 23S rRNA from *E. coli* has additional U/C sequence variation for which data are not provided at position s542, 1178, and 1229. The bisulfite-treated rRNA when sequenced failed to be read at sufficient depth at these positions to make reliable base call analyses.



**Figure S11.** Studies on  $\Psi$ -(SO<sub>3</sub><sup>-</sup>) adducts impacting the raw nanopore data.

We have a history of studying chemical modifications and adducts to DNA with single nanopore systems in which differences in the current vs. time traces were inspected.<sup>11-13</sup> We thought that it would be interesting to follow the  $\Psi$ -(SO<sub>3</sub><sup>-</sup>) adduct passing through the ONT system; furthermore, this information may help understand why the alignment of these adducted RNA strands was lower in yield than the unreacted RNA (Fig. S2, ESI<sup>+</sup>). A 200-nt long RNA was designed and studied with two  $\Psi$  sites separated by 99 nts in different sequence contexts (5`-GAXCA and 5`-CGXGC; Fig. S1, ESI<sup>+</sup>) for study of the current vs. time data for these adducts passing through the helicase-nanopore system. Inspection of the raw nanopore data from the ONT system first requires resquigglng to be conducted, which is the process of appending the base calls to the current levels from which they were derived. Two programs are routinely used for resquigglng, Tombo and Nanopolish.<sup>14,15</sup> This strand was sequenced with the ONT system with U,  $\Psi$ , or the  $\Psi$ -(SO<sub>3</sub><sup>-</sup>) adduct. Using Tombo or Nanopolish we found the percentage of reads successfully resquigglng decreased from ~70% for the U-containing RNA, to ~40% for the  $\Psi$ -containing RNA, and finally was ~30% for the  $\Psi$ -(SO<sub>3</sub><sup>-</sup>)-containing RNA (Fig. S11.1A).

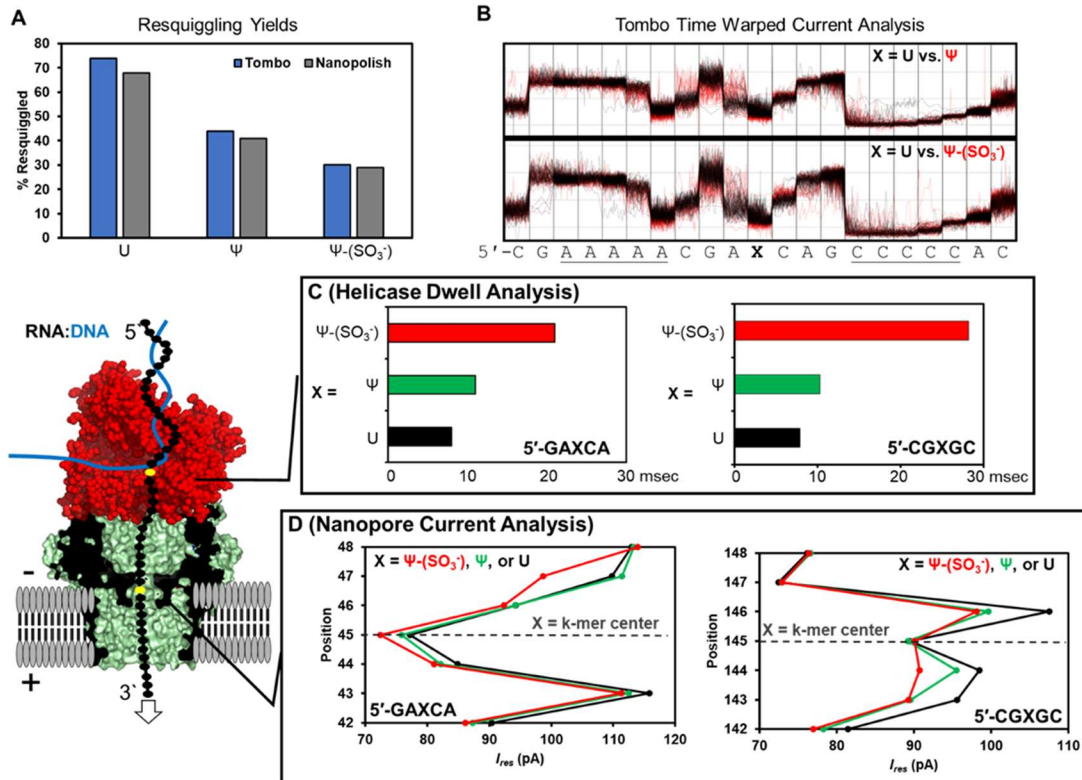

**Figure S11.1.** Inspection of the ionic current levels and dwell times for U, Ψ, and Ψ-(SO<sub>3</sub><sup>-</sup>) adducts as they pass through the dual helicase-nanopore sensors. (A) Percentage of U, Ψ, and Ψ-(SO<sub>3</sub><sup>-</sup>) adduct reads resquigglng by Tombo or Nanopolish. (B) Time-warped ionic current levels for the RNA modifications using Tombo. Plots of the (C) dwell times and (D) ionic-current levels as the sites of interest pass through the helicase or nanopore, respectively. The values were obtained from Nanopolish. (E) Example current vs. time traces for U, Ψ, and the Ψ-(SO<sub>3</sub><sup>-</sup>) adduct from the ONT nanopore sequencer.

Using the available data, time-warped plots (i.e., the dwell time is scaled to the same value for each event) of the raw data were constructed in Tombo to compare U vs. Ψ (Fig. S11.1B top panel) and U vs. Ψ-(SO<sub>3</sub><sup>-</sup>) (Fig. S11.1B bottom panel). The plots for the reads that made it through Tombo did not provide any additional clarity on the passage of the Ψ-(SO<sub>3</sub><sup>-</sup>) adduct through the nanopore most likely because they were filtered by the software. Using Nanopolish, the currents and dwell times can be extracted, plotted, and analyzed. Comparison of the helicase dwell times for U, Ψ, and Ψ-(SO<sub>3</sub><sup>-</sup>) in the two sequence contexts identified the average dwell time was shortest for U, intermediate for Ψ, and longest for the Ψ-(SO<sub>3</sub><sup>-</sup>) adducts (U ~7 msec, Ψ ~10 msec; and the Ψ-(SO<sub>3</sub><sup>-</sup>) adduct ~20-30 msec; Fig. S11.1C). As for the

residual current levels ( $I_{res}$ ) in the nanopore protein for U,  $\Psi$ , and  $\Psi$ -(SO<sub>3</sub><sup>-</sup>) adduct in the two sequence contexts, the location of maximal difference between the three nucleotides was sequence dependent (Fig. 11.1D). For the site at position 45 in the sequence 5'-GAXCA, the maximal  $I_{res}$  difference occurs when the adduct is in the center of the k-mer and at the 5' edge in the vestibule toward the helicase (i.e., positions 45 and 47 in Fig. S11.1D). For the site at position 145 in the sequence context 5'-CGXGC, the greatest difference in  $I_{res}$  occurred at all positions in the k-mer except when the modifications were in the center (Fig. S11.1D). When a difference in  $I_{res}$  was observed between U and  $\Psi$  or the  $\Psi$ -(SO<sub>3</sub><sup>-</sup>) adduct, the modifications were more blocking (i.e., lower  $I_{res}$  value) than the parent and the bisulfite adduct blocked the current more than  $\Psi$ . These data for sub-populations of the  $\Psi$  and  $\Psi$ -(SO<sub>3</sub><sup>-</sup>) adduct reads (Fig. S11.1A) point to raw data differences that influence the base calling algorithm resulting in the base calling errors observed; additionally, the  $\Psi$ -(SO<sub>3</sub><sup>-</sup>) adduct is more disruptive to the raw data resulting in greater base calling error compared to  $\Psi$  (Fig. S3).

We were not satisfied with only inspecting a subset of the reads with these computational tools; therefore, a small randomly selected population of the reads was extracted from the fast5 data files and inspected manually. The sequences were designed such that a 5-nt poly-A track was on the 5' side of the inspection site and a 5-nt poly-C track was on the 3' side to allow finding the position of the U,  $\Psi$ , or  $\Psi$ -(SO<sub>3</sub><sup>-</sup>) adduct visually in the raw data (Fig. S11.1B). This approach of looking at the data turned out to be very challenging because of the large deviation in dwell times from one sample to the next, and the current level differences from one nucleotide to the next were not easily differentiable in some cases; thus, our confidence in the quantification of these data is low. Nevertheless, we learned that the  $\Psi$ -(SO<sub>3</sub><sup>-</sup>) in many of the events inspected produced very noisy signals that likely challenged Guppy to base call the data, and Tombo and Nanopolish for resquigglng the data (Fig. S11.2). The key point is the data are recorded for highly distorted sites such as the  $\Psi$ -(SO<sub>3</sub><sup>-</sup>) adduct but the available computational tools impose limitations on studying these events in greater detail.

### Example U-containing RNA *i-t* trace

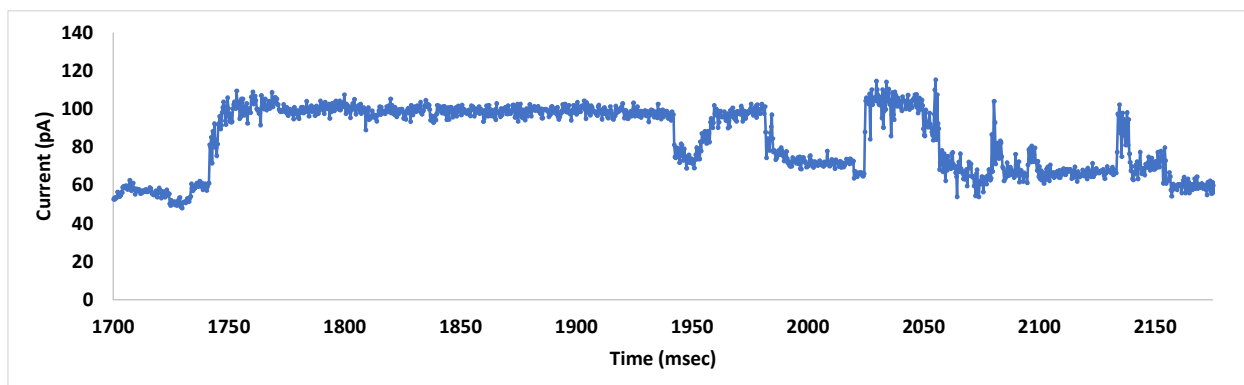

### Example $\Psi$ -(SO<sub>3</sub><sup>-</sup>)-containing RNA *i-t* trace.

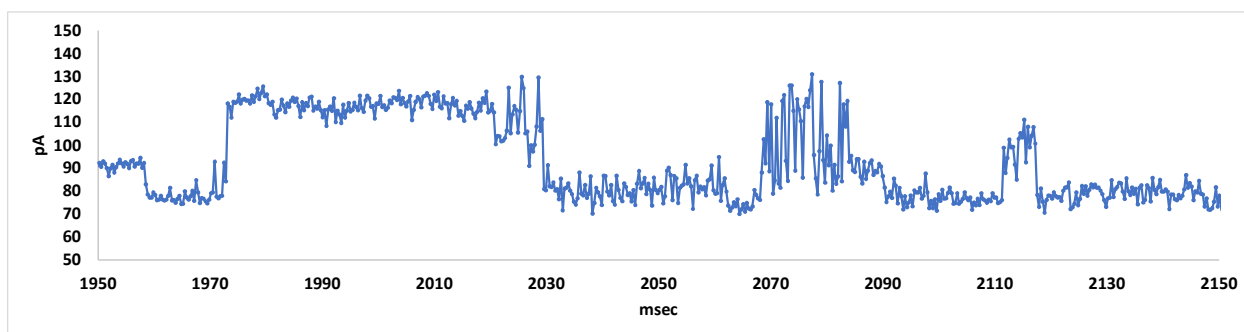

**Figure S11.2.** Example *i-t* traces for an RNA with a U (top) or  $\Psi$ -(SO<sub>3</sub><sup>-</sup>) adduct. The noisy portion of the adduct read starts at 2070 msec.

There are more examples in the data deposited in the public repository. This approach to understand the behavior of an adduct passing through the nanopore turned out to be very difficult to analyze because of the stochastic nature of the data, which is not apparent in plots made from Tombo. The goal was to learn about current levels and dwell times, but this was not achievable to our satisfaction; however, these data confirm the FastQC results that the data are recorded but the downstream programs fail to process the data.

## References

- (1) Fleming, A. M.; Mathewson, N. J.; Howpay Manage, S. A.; Burrows, C. J. Nanopore dwell time analysis permits sequencing and conformational assignment of pseudouridine in SARS-CoV-2. *ACS Cent. Sci.* **2021**, *7*, 1707-1717.
- (2) Fleming, A. M.; Bommiseti, P.; Xiao, S.; Bandarian, V.; Burrows, C. J. Nanopore sequencing for the 17 modification types in 36 locations in *E. coli* ribosomal RNA enables monitoring of stress-dependent changes. *ACS Chem. Biol.* **2023**, doi:10.1021/acscchembio.1023c00166.
- (3) Fleming, A. M.; Burrows, C. J. Nanopore sequencing for N1-methylpseudouridine in RNA reveals sequence-dependent discrimination of the modified nucleotide triphosphate during transcription. *Nucleic Acids Res.* **2023**, *51*, 1914-1926.
- (4) Taoka, M.; Nobe, Y.; Yamaki, Y.; Sato, K.; Ishikawa, H.; Izumikawa, K.; Yamauchi, Y.; Hirota, K.; Nakayama, H.; Takahashi, N.; Isobe, T. Landscape of the complete RNA chemical modifications in the human 80S ribosome. *Nucleic Acids Res.* **2018**, *46*, 9289-9298.
- (5) Popova, A. M.; Williamson, J. R. Quantitative analysis of rRNA modifications using stable isotope labeling and mass spectrometry. *J. Am. Chem. Soc.* **2014**, *136*, 2058-2069.
- (6) Booth, M. J.; Raiber, E.-A.; Balasubramanian, S. Chemical methods for decoding cytosine modifications in DNA. *Chem. Rev.* **2015**, *115*, 2240-2254.
- (7) Fleming, A. M.; Alenko, A.; Kitt, J. P.; Orendt, A. M.; Flynn, P. F.; Harris, J. M.; Burrows, C. J. Structural elucidation of bisulfite adducts to pseudouridine that result in deletion signatures during reverse transcription of RNA. *J. Am. Chem. Soc.* **2019**, *141*, 16450-16460.
- (8) Dai, Q.; Zhang, L.-S.; Sun, H.-L.; Pajdzik, K.; Yang, L.; Ye, C.; Ju, C.-W.; Liu, S.; Wang, Y.; Zheng, Z.; Zhang, L.; Harada, B. T.; Dou, X.; Irkliyenko, I.; Feng, X.; Zhang, W.; Pan, T.; He, C. Quantitative sequencing using BID-seq uncovers abundant pseudouridines in mammalian mRNA at base resolution. *Nat. Biotechnol.* **2023**, *41*, 344-354.
- (9) Zhang, M.; Jiang, Z.; Ma, Y.; Liu, W.; Zhuang, Y.; Lu, B.; Li, K.; Peng, J.; Yi, C. Quantitative profiling of pseudouridylation landscape in the human transcriptome. *Nat. Chem. Biol.* **2023**, doi:10.1038/s41589-41023-01304-41587.
- (10) Edelheit, S.; Schwartz, S.; Mumbach, M. R.; Wurtzel, O.; Sorek, R. Transcriptome-wide mapping of 5-methylcytidine RNA modifications in bacteria, archaea, and yeast reveals m5C within archaeal mRNAs. *PLoS Genet.* **2013**, *9*, e1003602.
- (11) An, N.; Fleming, A. M.; White, H. S.; Burrows, C. J. Nanopore detection of 8-oxoguanine in the human telomere repeat sequence. *ACS Nano* **2015**, *9*, 4296-4307.
- (12) Johnson, R. P.; Fleming, A. M.; Perera, R. T.; Burrows, C. J.; White, H. S. Dynamics of a DNA mismatch site held in confinement discriminate epigenetic modifications of cytosine. *J. Am. Chem. Soc.* **2017**, *139*, 2750-2756.
- (13) Schibel, A. E.; An, N.; Jin, Q.; Fleming, A. M.; Burrows, C. J.; White, H. S. Nanopore detection of 8-oxo-7,8-dihydro-2'-deoxyguanosine in immobilized single-stranded DNA via adduct formation to the DNA damage site. *J. Am. Chem. Soc.* **2010**, *132*, 17992-17995.
- (14) Stoiber, M.; Quick, J.; Egan, R.; Eun Lee, J.; Celniker, S.; Neely, R. K.; Loman, N.; Pennacchio, L. A.; Brown, J. De novo identification of DNA modifications enabled by genome-guided nanopore signal processing. *bioRxiv* **2017**, 094672.
- (15) Loman, N. J.; Quick, J.; Simpson, J. T. A complete bacterial genome assembled de novo using only nanopore sequencing data. *Nat. Meth.* **2015**, *12*, 733-735.
